# Supplementary material for: Cell wall as a target for bacteria inactivation by pulsed electric fields
Source: PubMed Central journal article supplement (PMC4735277; doi:10.1038/srep19778), 2016-02-01
Supplement: srep19778-s1.pdf [file srep19778-s1.pdf]

## Cell wall as a target for bacteria inactivation by pulsed electric fields

Flavien Pillet<sup>1,2</sup>, Cécile Formosa-Dague<sup>2,3,4,5</sup>, Houda Baaziz<sup>1,2</sup>, Etienne Dague<sup>1,3\*</sup>,  
Marie-Pierre Rols<sup>1,2\*</sup>

<sup>1</sup> CNRS; IPBS (Institut de Pharmacologie et de Biologie Structurale); 205 route de Narbonne BP64182,  
F-31077 Toulouse, France

<sup>2</sup> Université de Toulouse; UPS; IPBS; F-31077 Toulouse, France

<sup>3</sup> CNRS, LAAS, 7 avenue du Colonel Roche, F-31400 Toulouse, France

<sup>4</sup> CNRS, UMR 7565, SRSMC, Vandœuvre-lès-Nancy, France

<sup>5</sup> Université de Lorraine, UMR 7565, Faculté de Pharmacie, Nancy, France

\*Corresponding authors contributed equally to the work

Etienne Dague: [edague@laas.fr](mailto:edague@laas.fr)

Marie-Pierre Rols : [rols@ipbs.fr](mailto:rols@ipbs.fr)

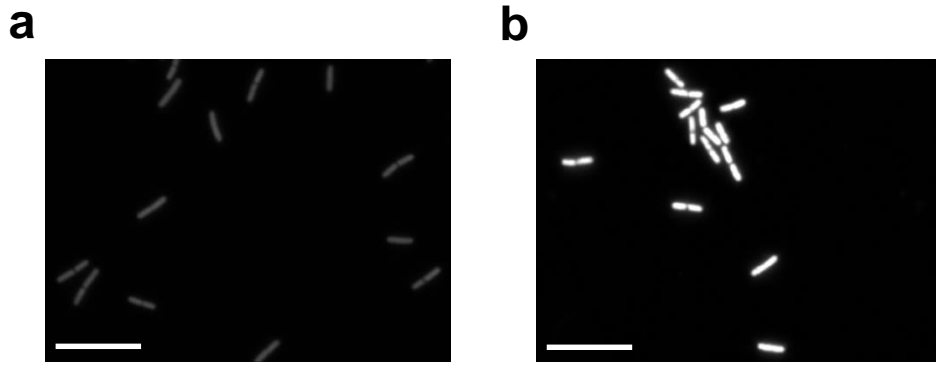

**Supplementary Fig.S1. Fluorescent microscopy of vegetative *B.pumilus* in presence of 100 µM of propidium iodide. (a) Example of bacteria in control condition and (b) after 1000 micropulses at 7.5kV/cm. Scale bars: 10 µm.**

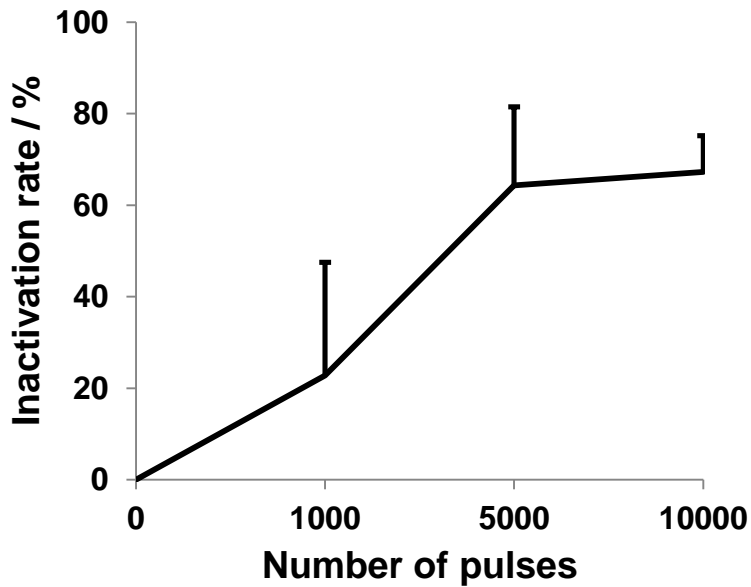

**Supplementary Fig. S2. Determination of spore inactivation according to the number of pulses of 5µs at 7.5 kV/cm. The inactivation rate was evaluated by colony counting.**

|            | Control   | Pulsed     | Statistic difference |
|------------|-----------|------------|----------------------|
| Vegetative | -34 ± 0.3 | - 28 ± 2.1 | ****                 |
| Spore      | -47 ± 1.0 | +20 ± 0.2  | ****                 |

**Supplementary Fig. S3. Zeta potential of control and pulsed bacteria. Each value(mV) were obtained from 9 independent measurements from 3 independent bacteria cultures.**

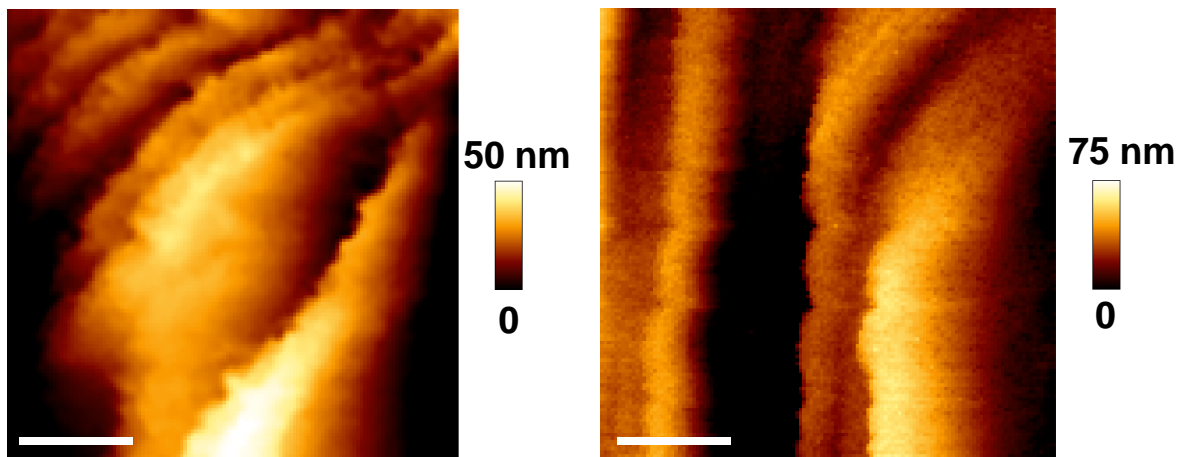

**Supplementary Fig. S4.** Examples of ridges on untreated spores observed by AFM in liquid. Scale bars: 100 nm.

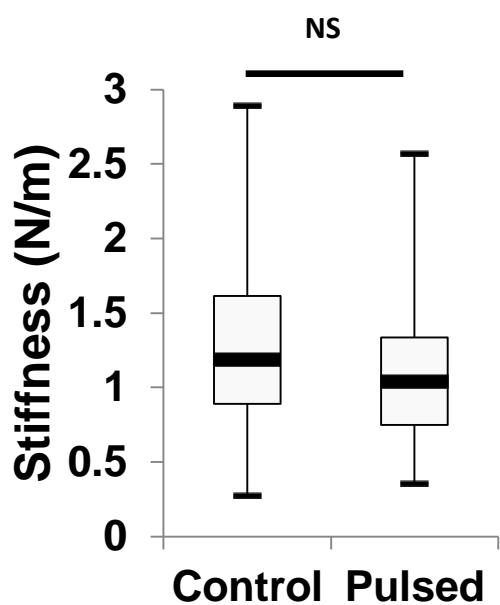

**Supplementary Fig. S5.** Statistical analysis of spore stiffness. Box revealed no significant differences of stiffness after PEF-exposure. The box plots were obtained with 15 spores from 3 independent experiments.

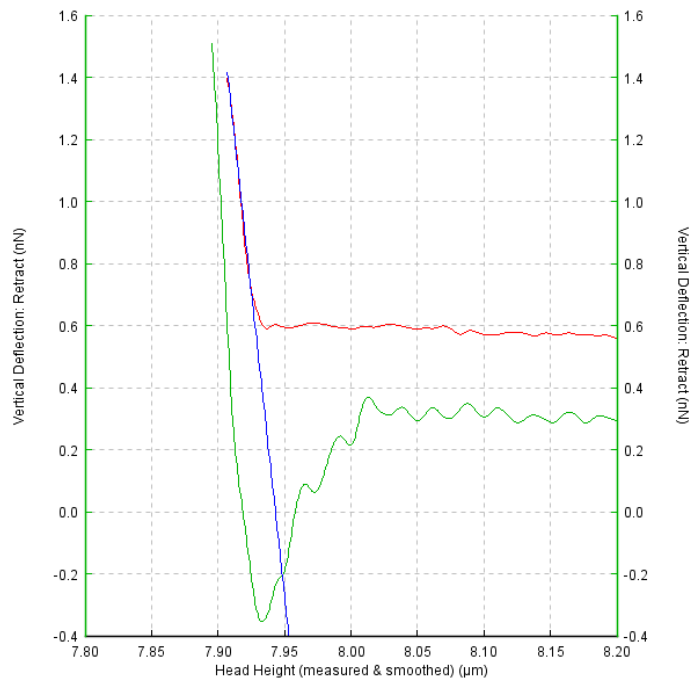

**Supplementary Fig. S6. Example of Force distance curve used for stiffness calculation.** The stiffness was calculated with the approach curve (red line) on 10 nm of indentation. The slope is shown in blue. The retract curve is exposed in green line.
